# Supplementary material for: Clinical Outcomes and Toxicity of First-Line Intensive Chemotherapy in Infant Medulloblastoma: A Single-Center Cohort Study Following AIEOP Recommendations
Source: Research Square preprint supplement (doi:10.21203/rs.3.rs-7366809/v1), 2025-08-22
Supplement: Supplementary file 1 [file bdfe761ee48f7b302e6def22.docx]

| **ID** | **Germinal test** | **Zigosity** | **Classification** | **Segregation** | **Somatic test** |
| --- | --- | --- | --- | --- | --- |
| 1 | Negative | / | / | / | n.a. |
| 2 | NM_004656.3 (BAP1): c.(638G>A) p.(Arg213His) NM_001040108.1 (MLH3): c.(4321C>T) p.(Gln1441Ter) | Heterozygous  Heterozygous | VUS  VUS | Maternal  Maternal | n.a. |
| 3 | n.a. | / | / | / | n.a. |
| 4 | n.a. | / | / | / | n.a. |
| 5 | NM_016169.3 (SUFU): c.[16delC];[=] p.[(Pro6LeufsTer90)];[(=)] | Heterozygous | Pat. | Paternal | NM_016169.3 (SUFU): c.[16delC]; p.[(Pro6fs*90)] LOH |
| 6 | NM_006231.3 (POLE): c.(2584_2585delGA) p.(Asp862fs*45)  NM_002485.4 (NBN): c.(2216T>C) p.(Leu739Pro) | Heterozygous  Heterozygous | P.Pat  VUS | Unknown  Unknown | NM_006231.3 (POLE): c.2584_2585delGA; p.Asp862fs*46 VAF41%  NM_002485.4 (NBN): c.2216T>C; p.Leu739Pro VAF 42% |
| 7 | n.a. | / | / | / | n.a. |
| 8 | Negative | / | / | / | Gain MYC |
| 9 | Negative | / | / | / | NM_001128425.1 (MUTYH): c.1187G>A; p.Gly396Asp VAF 63%  NM_000435.2 (NOTCH3): c-3314delG; p.Gly1105fs*167 VAF 45% |
| 10 | n.e | / | / | / | n.a. |
| 11 | n.e | / | / | / | n.a. |
| 12 | NM_000179.2 (MSH6): c.(3416G>A) p.(Gly1139Asp) | Heterozygous | VUS | Maternal | n.a. |
| 13 | NM_153832.2 (GPR161): c.(714dupG) p.(Arg239fs*54) NM_000264.5 (PTCH1): c.(113G>A) p.(Gly38Glu) | Heterozygous  Heterozygous | P.Pat  VUS | Paternal Paternal | n.a. |
| 14 | n.e | / | / | / | n.a. |
| 15 | NM_000264.3 (PTCH1): c.(3917C>A) p.(Pro1306His) | Heterozygous | VUS | Unknown | n.a. |
| 16 | NM_004380.3 (CREBBP): c.7049A>G (p.Gln2350Arg) | Heterozygous | VUS | Paternal | fusion: TFG::ADGRG7  NM_004380.3 (CREBBP): c.7049A>G (p.Gln2350Arg) VAF 48%  NM_005922.2 (MAP3K4): c.479delA; p.Asn160fs*8 VAF 5% |
| 17 | Negative | / | / | / | n.a. |
| 18 | NM_022552.5 (DNMT3A): c.(427C>T); p.(Arg143Ter) | Heterozygous | P.Pat. | Paternal | NM_022552.4 (DNMT3A): c.427C>T; p.Arg143* VAF 45%  NM_005631.4 (SMO): c.1234C>T; p.Leu412Phe VAF 44% |
| 19 | n.a. | / | / | / | n.a. |
| 20 | NM_016169.4 (SUFU): c.(364delT) p.(Arg123fsTer2) | Heterozygous | P.Pat. | Maternal | n.a. |
| 21 | n.a. | / | / | / | n.a. |
| 22 | NM_003883.3 (HDAC3): c.(820C>T) p.(Arg274Ter) NM_000321.2 (RB1): c.(66_67=/>insCCG) p.(Pro23=/dup) | Heterozygous  Heterozygous | VUS  VUS | Unknown  Unknown | n.a. |
| 23 | NM_007194.3 (CHEK2): c.(507delT) p.(Phe169LeufsTer2)  NM_000314.4 (PTEN): c.(79T>A) p.(Tyr27Asn) | Heterozygous  Heterozygous | Pat.  Pat. | Paternal  De novo | NM_000314.4 (PTEN): c.79T>A; p.Y27N VAF 47% e c.388C>G;p.R130G VAF 34%  NM_007194.3 (CHEK2): c.507delT; p.F169LfsX2 VAF 48% |
| 24 | NM_001048173.1 (MUTYH):c.[1353_1355delGGA];p.[(Glu452del)] NM_001048173.1 (MUTYH): c.[228C>A] p.[(Tyr76*)] | Heterozygous  Heterozygous | P.Pat  Pat | Maternal  Paternal | NM_005631.4(SMO): c.1604G>T; p.Trp535Leu VAF 48% |
| 25 | n.a. | / | / | / | n.a. |
